# Supplementary material
Source: publisher figshare collection journal article supplement (https://acs.figshare.com/ndownloader/files/4287031)
Supplement: Supplementary file 1 [file 4287031]

**Unique inclusion properties of crystalline powder *p*-tert-butylthiacalix[4]arene toward alcohols and carboxylic acids**

Naoya Morohashi,<sup>\*</sup> Shintaro Noji, Hiroko Nakayama, Yasutaka Kudo, Shinya Tanaka,  
Chizuko Kabuto, and Tetsutaro Hattori<sup>\*</sup>

*Department of Biomolecular Engineering, Graduate School of Engineering, Tohoku  
University, 6-6-11 Aramaki-Aoba, Aoba-ku, Sendai 980-8579, Japan*

**Supporting Information**

Contents:

|      |                                                |    |
|------|------------------------------------------------|----|
| I.   | Materials                                      | S1 |
| II.  | Powder X-ray diffraction (PXRD) studies        | S2 |
| III. | Thermogravimetric analysis (TGA)               | S3 |
| IV.  | Single crystal X-ray diffraction (XRD) studies | S4 |
| V.   | References                                     | S6 |

**I. Materials**

Alcohols (MeOH, EtOH and PrOH) and HCO<sub>2</sub>H as guest were distilled before use. MeCO<sub>2</sub>H and EtCO<sub>2</sub>H were used as purchased. Other solvents were distilled before use. *p*-tert-Butylthiacalix[4]arene (**2**) was synthesized as reported previously [1].

## II. Powder X-ray Diffraction (PXRD) Studies

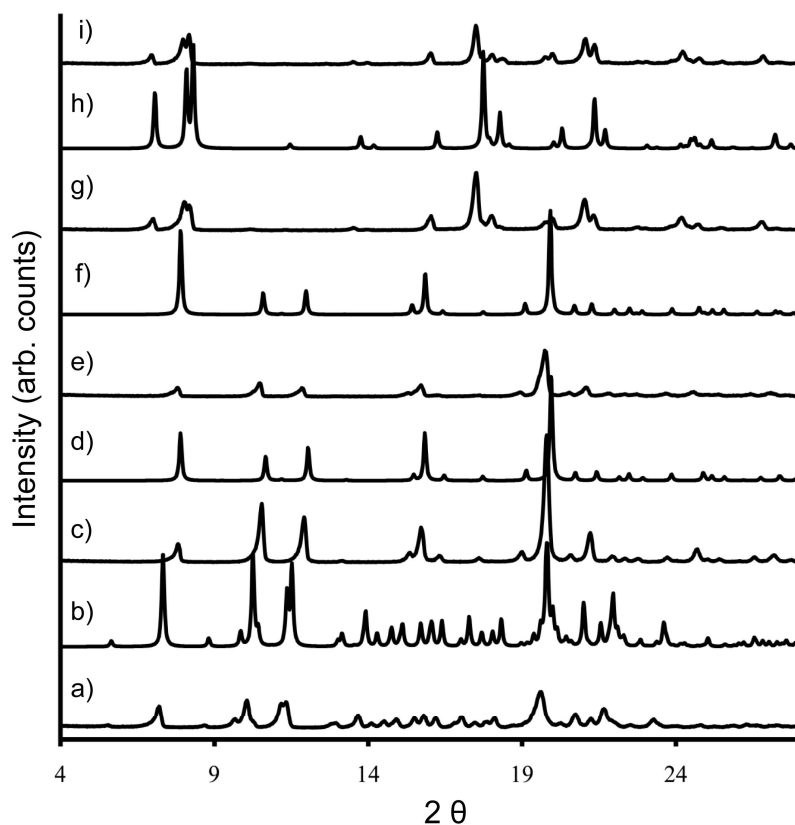

**Figure S1.** PXRD patterns of a crystalline powder of compound **2** and its inclusion crystals with alcohols and acids: (a) experimental chart for **2**, (b) simulation from XRD data of **2** [2], (c) experimental chart for inclusion crystals taken from EtOH, (d) simulation from XRD data of **2**·EtOH, (e) experimental chart for inclusion crystals taken from MeCO<sub>2</sub>H, (f) simulation from XRD data of **2**·MeCO<sub>2</sub>H, (g) experimental chart for inclusion crystals taken from EtCO<sub>2</sub>H, (h) simulation from XRD data of **2**·[EtCO<sub>2</sub>H]<sub>3</sub>, (i) experimental chart for inclusion crystals taken from an equimolar mixture of MeCO<sub>2</sub>H and EtCO<sub>2</sub>H.

### III. Thermogravimetric Analysis (TGA)

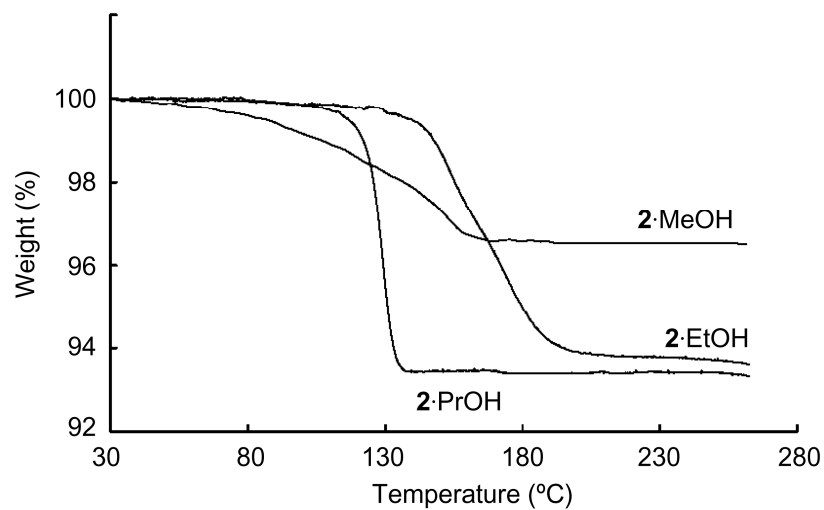

**Figure S2.** TGA desorption curves for 2-MeOH, 2-EtOH and 2-PrOH.

#### IV. Single crystal X-ray diffraction (XRD) studies

Single-crystal X-ray diffraction data were collected with a Bruker APEX II CCD diffractometer using Mo- $K\alpha$  radiation ( $\lambda = 0.71073 \text{ \AA}$ ) employing a “Bruker Helios multilayered confocal mirror” as monochromator and a “Bruker TXS fine-focus rotating anode” as radiation source. Data integration and reduction were performed with the SAINT and XPREP software and the absorption correction was performed by the semi-empirical method with SADABS [3]. The structure was solved by the direct method using SHELXS-97 [4] and refined by using least-squares methods on  $F^2$  with SHELXL-97 [4]. X-ray analysis was undertaken using the free GUI software of Yadokari-XG 2009 [5].

**Data for 2·MeOH.**  $C_{41}H_{52}O_5S_4$ , fw = 753.07, tetragonal,  $P4/nmm$ ,  $a = 15.7827(7) \text{ \AA}$ ,  $b = 15.7827(7) \text{ \AA}$ ,  $c = 8.2365(7) \text{ \AA}$ ,  $V = 2051.7(2) \text{ \AA}^3$ ,  $Z = 2$ ,  $T = 223(2) \text{ K}$ , 11188 reflections measured, 1332 independent reflections, 1190 reflections were observed ( $I > 2\sigma(I)$ ),  $R_1 = 0.1021$ ,  $wR_2 = 0.2658$  (observed),  $R_1 = 0.1072$ ,  $wR_2 = 0.2874$  (all data).

**Data for 2·EtOH.**  $C_{42}H_{54}O_5S_4$ , fw = 767.09, tetragonal,  $P4/nmm$ ,  $a = 15.8115(11) \text{ \AA}$ ,  $b = 15.8115(11) \text{ \AA}$ ,  $c = 8.2875(12) \text{ \AA}$ ,  $V = 2071.9(4) \text{ \AA}^3$ ,  $Z = 2$ ,  $T = 223(2) \text{ K}$ , 11205 reflections measured, 1341 independent reflections, 1107 reflections were observed ( $I > 2\sigma(I)$ ),  $R_1 = 0.0975$ ,  $wR_2 = 0.2933$  (observed),  $R_1 = 0.1078$ ,  $wR_2 = 0.3189$  (all data).

**Data for 2·PrOH.**  $C_{43}H_{56}O_5S_4$ , fw = 781.12, tetragonal,  $P4/nmm$ ,  $a = 15.7986(9) \text{ \AA}$ ,  $b = 15.7986(9) \text{ \AA}$ ,  $c = 8.5474(10) \text{ \AA}$ ,  $V = 2133.4(3) \text{ \AA}^3$ ,  $Z = 2$ ,  $T = 223(2) \text{ K}$ , 11373 reflections measured, 1378 independent reflections, 1174 reflections were observed ( $I > 2\sigma(I)$ ),  $R_1 = 0.1216$ ,  $wR_2 = 0.3761$  (observed),  $R_1 = 0.1298$ ,  $wR_2 = 0.4127$  (all data).

**Data for 2·MeCO<sub>2</sub>H.**  $C_{42}H_{52}O_6S_4$ , fw = 781.08, tetragonal,  $P4/nmm$ ,  $a = 15.8002(7) \text{ \AA}$ ,  $b = 15.8002(7) \text{ \AA}$ ,  $c = 8.3491(7) \text{ \AA}$ ,  $V = 2084.3(2) \text{ \AA}^3$ ,  $Z = 2$ ,  $T = 223(2) \text{ K}$ , 11175 reflections measured, 1346 independent reflections, 1140 reflections were observed ( $I > 2\sigma(I)$ ),  $R_1 = 0.1050$ ,  $wR_2 = 0.3192$  (observed),  $R_1 = 0.1124$ ,  $wR_2 = 0.3539$  (all data).

**Data for 2·[EtCO<sub>2</sub>H]<sub>3</sub>.** C<sub>49</sub>H<sub>66</sub>O<sub>10</sub>S<sub>4</sub>, fw = 943.26, tetragonal, *I*4/*mmm*, *a* = 15.401(8) Å, *b* = 15.401(8) Å, *c* = 21.204(10) Å, *V* = 5029(4) Å<sup>3</sup>, *Z* = 4, *T* = 100(2) K, 13823 reflections measured, 1665 independent reflections, 1591 reflections were observed (*I* > 2σ(*I*)), *R*<sub>1</sub> = 0.1094, *wR*<sub>2</sub> = 0.2935 (observed), *R*<sub>1</sub> = 0.1152, *wR*<sub>2</sub> = 0.2993 (all data).

## V. References

- [1] Iki, N.; Kabuto, C.; Fukushima, T.; Kumagai, H.; Takeya, H.; Miyanari, S.; Miyashi, T.; Miyano, S. *Tetrahedron*, **2000**, 56, 1437.
- [2] Bilyk, A.; Hall, A. K.; Harrowfield, J. M.; Hosseini, M. W.; Skeltone, B. W.; White, A. H. *Inorg. Chem.* **2001**, 40, 672.
- [3] (a) *SMART, SAINT, and XPREP, Area Detector Control and Data Integration and Reduction Software*, Bruker Analytical X-ray Instruments Inc: Madison, WI, 1995.  
(b) Sheldrick, G. M. *SADABS, Empirical Absorption Correction Program for Area Detector Data*, University of Göttingen: Göttingen, Germany, 1996.
- [4] Sheldrick, G. M. *SHELEX-97, Programs for the Refinement of Crystal structures*; University of Göttingen: Göttingen, Germany, 1997.
- [5] (a) Wakita, K. *Yadokari-XG, Software for Crystal Structure Analyses*, 2001. (b) Kabuto, C.; Akine, S.; Nemoto, T.; Kwon, E. *J. Cryst. Soc. Jpn.* **2009**, 51, 218.
